# Supplementary material for: Dihydrogenactivation by sulfido-bridged dinuclear Ru/Ge complexes: insight into the [NiFe] hydrogenase unready state
Source: Royal Society of Chemistry journal article supplement (doi:10.1039/c0cc03391j), 2010-11-12
Supplement: c0cc03391j.pdf [file c0cc03391j.pdf]

**Dihydrogen activation by sulfido-bridged dinuclear Ru/Ge complexes:  
insight to the [NiFe] hydrogenase unready state**

Tsuyoshi Matsumoto,\* Naohisa Itakura, Yukiko Nakaya, and Kazuyuki Tatsumi\*

*Department of Chemistry, Graduate School of Science, and Research Center for Materials  
Science, Nagoya University, Furo-cho, Chikusa-ku, Nagoya 464-8602, Japan*

**Supporting Information**

**General.** All reactions and manipulations of air-sensitive compounds were conducted under an inert atmosphere of dry nitrogen employing standard Schlenk techniques. Toluene, THF, hexane, dichloromethane, and hexamethyldisiloxane (HMDSO) were degassed and dried according to the Grubbs' report,<sup>1</sup> where the solvents were passed over columns of activated alumina and a supported copper catalyst supplied from Hansen & Co. Ltd. C<sub>6</sub>D<sub>6</sub> was dried over sodium and distilled prior to use. <sup>1</sup>H NMR (500 or 600 MHz) and <sup>31</sup>P NMR spectra (202 or 243 MHz) were recorded on a JEOL JNM-ECP500 or ECA600 spectrometer. <sup>1</sup>H NMR chemical shifts were quoted in ppm relative to the residual protons of deuterated solvents. <sup>31</sup>P{<sup>1</sup>H} NMR chemical shifts were referenced to signals of external 85% H<sub>3</sub>PO<sub>4</sub>. Elemental analyses were performed on a LECO CHNS-932 microanalyzer. The synthesis and spectroscopic data of [Dmp(Dep)Ge( $\mu$ -S)( $\mu$ -OH)Ru(PEt<sub>3</sub>)](BAR<sup>F</sup><sub>4</sub>) (**2b**), Dmp(Dep)Ge( $\mu$ -S)<sub>2</sub>Ru(PR<sub>3</sub>) (**3a**; R = Ph, **3b**; R = Et), [Dmp(Dep)Ge( $\mu$ -S)( $\mu$ -SH)Ru(PR<sub>3</sub>)](BAR<sup>F</sup><sub>4</sub>) (**4a**; R = Ph, **4b**; R = Et), [Dmp(Dep)Ge( $\mu$ -S)( $\mu$ -H)Ru(PPh<sub>3</sub>)](BAR<sup>F</sup><sub>4</sub>) (**5a**), and Dmp(Dep)Ge( $\mu$ -S)Ru(PPh<sub>3</sub>) (**6a**) were reported in our previous papers.<sup>2,3</sup>

**Synthesis of [Dmp(Dep)Ge( $\mu$ -S)( $\mu$ -H)Ru(PEt<sub>3</sub>)](BAR<sup>F</sup><sub>4</sub>) (**5b**).** A toluene solution of **2b** (120.0 mg, 0.0720 mmol) was stirred under an atmospheric pressure of H<sub>2</sub> for 6 h at r.t. The solution was evaporated to dryness, and the yellow residue was crystallized from HMDSO/CH<sub>2</sub>Cl<sub>2</sub> at -30 °C to give **5b** as yellow crystals in 84% yield. When the same reaction was performed in C<sub>6</sub>D<sub>6</sub> and monitored by <sup>1</sup>H NMR analysis, a quantitative formation of **5b** and H<sub>2</sub>O ( $\delta$  0.34) was observed within 5 min at r.t. Data for **5b**; <sup>1</sup>H NMR (600 MHz, C<sub>6</sub>D<sub>6</sub>):  $\delta$  8.63 (s, 8H, *o*-CH of BAR<sup>F</sup>), 7.47 (s, 4H, *p*-CH of BAR<sup>F</sup>), 7.54 (t, *J* = 7.8 Hz, 1H, *p*-CH of Dmp), 7.17 (t, *J* = 7.8 Hz, 1H, *p*-CH of Dep), 7.12 (d, *J* = 7.8 Hz, 1H, *m*-CH of Dmp), 6.95 (d, *J* = 7.8 Hz, 1H, *m*-CH of Dmp), 6.76 (d, *J* = 7.8 Hz, 1H, *m*-CH of Dep), 6.69 (s, 1H, *m*-CH of Mes), 6.16 (d, *J* = 7.8 Hz, 1H, *m*-CH of Dep), 6.13 (s, 1H, *m*-CH of Mes), 5.85 (s, 1H, *m*-CH of Mes), 5.19 (s, 1H, *m*-CH of Mes), 2.93 (dq, *J*<sub>1</sub> = 7.8 Hz, *J*<sub>2</sub> = 14.2 Hz, 1H, CH<sub>2</sub>CH<sub>3</sub> of Dep), 2.65 (dq, *J*<sub>1</sub> = 7.8 Hz, *J*<sub>2</sub> = 14.2 Hz, 1H, CH<sub>2</sub>CH<sub>3</sub> of Dep), 2.61 (dq, *J*<sub>1</sub> = 7.8 Hz, *J*<sub>2</sub> = 14.2 Hz, 1H, CH<sub>2</sub>CH<sub>3</sub> of Dep), 2.17 (s, 3H, CH<sub>3</sub> of Mes), 2.15 (s, 3H, CH<sub>3</sub> of Mes), 2.08 (s, 3H, CH<sub>3</sub> of Mes), 2.02 (dq, *J*<sub>1</sub> = 7.8 Hz, *J*<sub>2</sub> = 14.2 Hz, 1H, CH<sub>2</sub>CH<sub>3</sub> of Dep), 1.92 (s, 3H, CH<sub>3</sub> of Mes), 1.83 (s, 3H, CH<sub>3</sub> of Mes), 1.57 (s, 3H, CH<sub>3</sub> of Mes), 1.40 (dq, *J*<sub>H-P</sub> = 155.4 Hz, *J*<sub>H-H</sub> = 7.5 Hz, 6H, PCH<sub>2</sub>CH<sub>3</sub>), 1.20 (t, *J* = 7.8 Hz, 3H, CH<sub>2</sub>CH<sub>3</sub> of Dep), 0.92 (t, *J* = 7.8 Hz, 3H, CH<sub>2</sub>CH<sub>3</sub> of Dep), 0.78 (dt, *J*<sub>P-H</sub> = 16.2 Hz, *J*<sub>H-H</sub> = 7.5 Hz, 9H, PCH<sub>2</sub>CH<sub>3</sub>), -10.50 (d, *J*<sub>H-P</sub> = 7.2 Hz, 1H, Ru-H). <sup>31</sup>P{<sup>1</sup>H} NMR (243 Hz, C<sub>6</sub>D<sub>6</sub>)  $\delta$  27.4. Anal. Calcd for C<sub>72</sub>H<sub>66</sub>BF<sub>24</sub>GePRuS: C, 52.90; H, 4.07; S, 1.96. Found: C, 52.65; H, 3.89; S, 2.01.

**Reaction of 4b and H<sub>2</sub>.** A benzene-d<sub>6</sub> solution of **4b** (50.0 mg, 0.0300 mmol) was placed into a 5mmϕ NMR tube with a gas inlet, and the solution was degassed with three freeze–pump–thaw cycles. The tube was connected to a balloon filled with H<sub>2</sub> gas, and the solution was warmed to 80 °C. After 3 days, the products were analysed by <sup>1</sup>H NMR spectra, which showed the solution contained **4b** and **5b** in a 17 : 83 ratio.

**Reaction of 4a and H<sub>2</sub>O.** A THF-*d*<sub>10</sub> solution of **4a** (50.0 mg, 0.0282 mmol) and 10 equiv H<sub>2</sub>O was placed into a 5mmϕ NMR tube. The solution was stirred at 298 K for 1 day and analysed by <sup>1</sup>H NMR spectra, which displays the signals of **4a** and **2a** in 98 : 2 ratio.

**Reaction of 4a and H<sub>2</sub> in the presence of H<sub>2</sub>O.** A THF solution of **4a** (100.0 mg, 0.0564 mmol) was refluxed under an atmospheric pressure of H<sub>2</sub> for 1 day. The solution was evaporated to dryness, and the yellow residue was crystallized from HMDSO/CH<sub>2</sub>Cl<sub>2</sub> to give **5b** as yellow crystals in 68% yield.

**Deprotonation Reaction of 5b.** To an acetonitrile solution of **5b** (100 mg, 0.0612 mmol) was added NaH (5.0 mg, 0.21 mmol) and stirred for 10 h at r.t. All the volatiles were removed in vacuo and the residue was extracted by toluene. Complex **6b** was obtained quantitatively as a yellow powder.

**Protonation Reaction of 6b.** To a THF solution of **6b** (50.0 mg, 0.0649 mmol) was added H(OEt<sub>2</sub>)<sub>2</sub>BAR<sup>F</sup><sub>4</sub> (80 mg, 0.079 mmol) and stirred for 10 h at r.t. All the volatiles were removed in vacuo and the residue was extracted by toluene. Complex **5b** was obtained quantitatively as a yellow powder. Data for **6b**; <sup>1</sup>H NMR (600 MHz, C<sub>6</sub>D<sub>6</sub>): δ 7.10 (d, *J* = 6.4 Hz, 1H, *m*-CH of Dmp), 6.96 (t, *J* = 7.8 Hz, 1H, *p*-CH of Dmp), 6.82 (d, *J* = 6.4 Hz, 1H, *m*-CH of Dmp), 6.74 (s, 1H, *m*-CH of Mes), 6.70 (d, *J* = 7.8 Hz, 1H, *m*-CH of Dep), 6.58 (d, *J* = 7.8 Hz, 1H, *m*-CH of Dep), 6.31 (s, 1H, *m*-CH of Mes), 5.77 (s, 1H, *m*-CH of Mes), 3.73 (dq, *J*<sub>1</sub> = 7.8 Hz, *J*<sub>2</sub> = 14.2 Hz, 1H, CH<sub>2</sub>CH<sub>3</sub> of Dep), 3.54 (s, 1H, *m*-CH of Mes), 3.31 (dq, *J*<sub>1</sub> = 7.8 Hz, *J*<sub>2</sub> = 14.2 Hz, 1H, CH<sub>2</sub>CH<sub>3</sub> of Dep), 2.97 (dq, *J*<sub>1</sub> = 7.8 Hz, *J*<sub>2</sub> = 14.2 Hz, 1H, CH<sub>2</sub>CH<sub>3</sub> of Dep), 2.30 (s, 3H, CH<sub>3</sub> of Mes), 2.28 (s, 3H, CH<sub>3</sub> of Mes), 2.20 (dq, *J*<sub>1</sub> = 7.8 Hz, *J*<sub>2</sub> = 14.2 Hz, 1H, CH<sub>2</sub>CH<sub>3</sub> of Dep), 2.19 (s, 3H, CH<sub>3</sub> of Mes), 1.89 (s, 3H, CH<sub>3</sub> of Mes), 1.73 (s, 3H, CH<sub>3</sub> of Mes), 1.44 (s, 3H, CH<sub>3</sub> of Mes), 1.37 (dq, *J*<sub>H-P</sub> =

155.4 Hz,  $J_{H-H} = 7.5$  Hz, 6H, PCH<sub>2</sub>CH<sub>3</sub>), 1.15 (t,  $J = 7.3$  Hz, 3H, CH<sub>2</sub>CH<sub>3</sub> of Dep), 1.08 (t,  $J = 7.3$  Hz, 3H, CH<sub>2</sub>CH<sub>3</sub> of Dep), 0.75 (dt,  $J_{P-H} = 16.2$  Hz,  $J_{H-H} = 7.5$  Hz, 9H, PCH<sub>2</sub>CH<sub>3</sub>).  
Anal. Calcd for C<sub>40</sub>H<sub>53</sub>GePRuS: C, 62.34; H, 6.93; S, 4.16. Found: C, 61.97; H, 6.70; S, 4.25.

## References

1. A. B. Pangborn, M. A. Giardello, R. H. Grubbs, R. K. Rosen, F. J. Timmers, *Organometallics*, 1996, **15**, 1518.
2. T. Matsumoto, Y. Nakaya, K. Tatsumi, *Organometallics*, 2006, **25**, 4835.
3. T. Matsumoto, Y. Nakaya, N. Itakura, K. Tatsumi, *J. Am. Chem. Soc.*, 2008, **130**, 2458.
